# Supplementary material for: Studying copy number variations using a nanofluidic platform
Source: PubMed Central journal article supplement — Nucleic Acids Res. 2008 Aug 18;36(18):e116. doi: 10.1093/nar/gkn518 (PMC2566873; doi:10.1093/nar/gkn518), 2008-08-18
Supplement: gkn518_1.pdf [file gkn518_1.pdf]

Supplementary Table 1. Sequences of the synthetic construct (human RPP30 gene) and the primers and probe used to amplify it.

|                 |                                                                          |
|-----------------|--------------------------------------------------------------------------|
| RPP30 construct | 5' AGATTTGGACCTGCGAGCGGGTTCTGACCTGAA<br>GGCTCTGCGCGGACTTGTGGAGACAGCCGCTC |
| RPP30 primer 1  | 5' AGATTTGGACCTGCGAGCG                                                   |
| RPP30 primer 2  | 5' GAGCGGCTGTCTCCACAAGT                                                  |
| RPP30 probe     | 5' FAM-TTCTGACCTGAAGGCTCTGCGCG-BHQ                                       |

Supplementary Table 2. Sequences of the CYP2D6 and ERBB2 primers and probes.

|                 |                                     |
|-----------------|-------------------------------------|
| CYP2D6 primer 1 | 5' CTTCACCTCCCTGCTGCAG              |
| CYP2D6 primer 2 | 5' TCACCAGGAAAGCAAAGACA             |
| CYP2D6 probe    | 5' FAM-CCG GCCCAGCCACCATGG-BHQ      |
| ERBB2 primer 1  | 5' AAGCTAAGAAATAAGGCCAGATGG         |
| ERBB2 primer 2  | 5' CGCACAGCACCAAGGAAAAG             |
| ERBB2 probe     | 5' FAM-CAGCAGAACAACGCAGCCCTCCCT-BHQ |
